# Supplementary material for: Controllable synthesis of 3D hierarchical Co3O4 nanocatalysts with various morphologies for the catalytic oxidation of toluene
Source: Royal Society of Chemistry journal article supplement (doi:10.1039/c7ta09149d), 2017-11-29
Supplement: c7ta09149d1.pdf [file c7ta09149d1.pdf]

**Controllable synthesis of 3D hierarchical Co<sub>3</sub>O<sub>4</sub>  
nanocatalysts with various morphologies for toluene  
catalytic oxidation**

Quanming Ren<sup>a</sup>, Shengpeng Mo<sup>a</sup>, Ruosi Peng<sup>a</sup>, Zhentao Feng<sup>a</sup>, Mingyuan Zhang<sup>a</sup>,

Limin Chen<sup>a,b,c</sup>, MingliFu<sup>a,b,c</sup>, Junliang Wu<sup>a,b,c</sup>, Daiqi Ye<sup>a,b,c\*</sup>

<sup>a</sup> School of Environment and Energy, South China University of Technology, Guangzhou 510006,  
China;

<sup>b</sup> Guangdong Provincial Key Laboratory of Atmospheric Environment and Pollution Control  
(SCUT), Guangzhou 510006, China;

<sup>c</sup> National Engineering Laboratory for VOCs Pollution Control Technology and Equipment,  
Guangzhou 510006, China;

(\*) Corresponding author: Tel: +86-20-39380516; E-mail: cedqye@scut.edu.cn

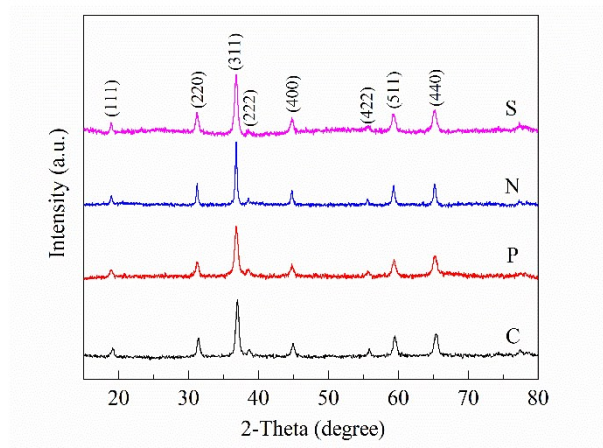

**Fig. S1.** XRD patterns of the spent Co<sub>3</sub>O<sub>4</sub> samples.

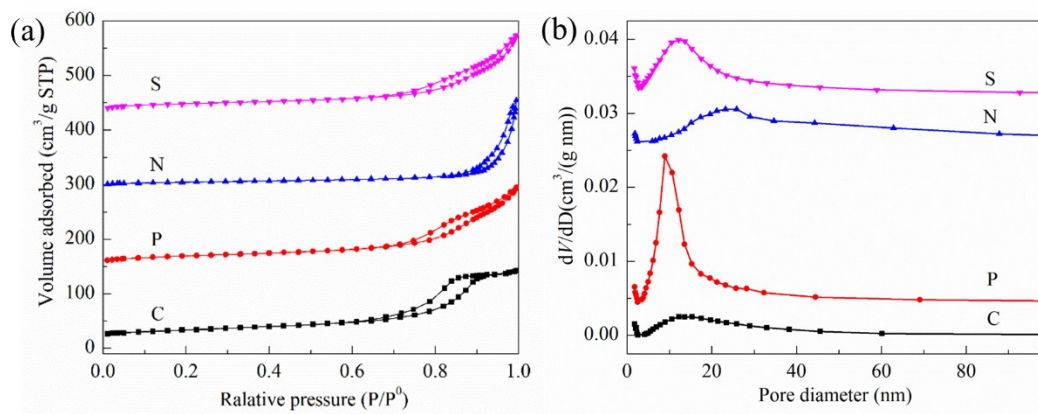

**Fig. S2.** N<sub>2</sub> adsorption-desorption isotherms curves (a) and pore size distributions calculated from the desorption branch (b) of spent Co<sub>3</sub>O<sub>4</sub> catalysts.

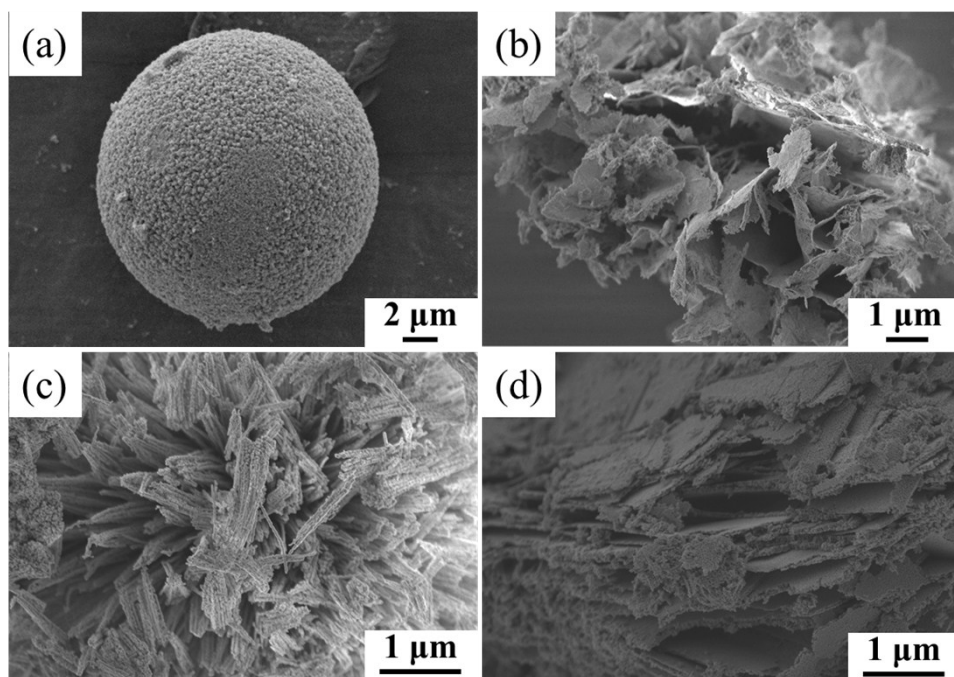

**Fig. S3.** SEM images of the spent  $\text{Co}_3\text{O}_4$  samples, (a) C, cubes-stacked sample; (b) P, plates-stacked sample; (c) N, needles-stacked sample; (d) S, sheets-stacked sample.

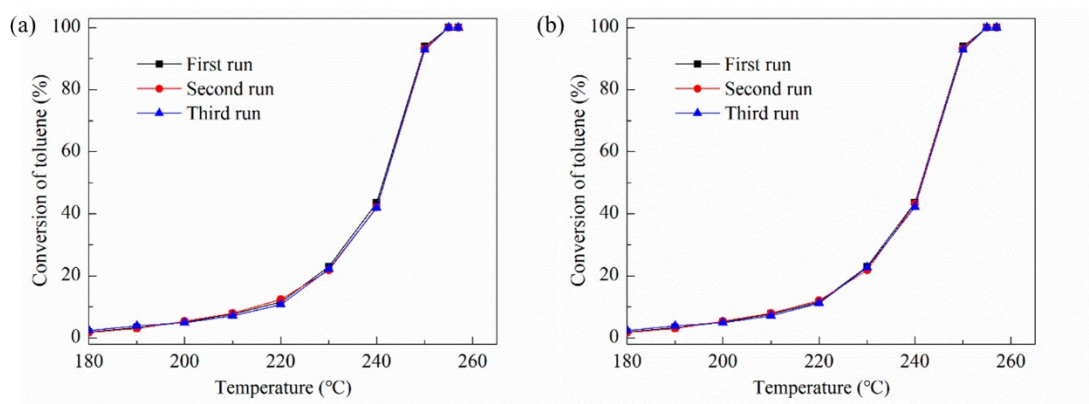

**Fig. S4.** Conversion of toluene over  $\text{Co}_3\text{O}_4$  catalyst with three consecutive catalytic runs, (a) C, cubes-stacked sample; (b) N, needles-stacked sample.

**Table S1** The results from XRD and BET analyses of spent Co<sub>3</sub>O<sub>4</sub> samples.

| Sample | Crystallite size <sup>a</sup><br>(nm) | S <sub>BET</sub><br>(m <sup>2</sup> /g) | Pore volume<br>(cm <sup>3</sup> /g) | Average pore size<br>(nm) |
|--------|---------------------------------------|-----------------------------------------|-------------------------------------|---------------------------|
| C      | 18                                    | 80.8                                    | 0.25                                | 11.8                      |
| P      | 19                                    | 57.6                                    | 0.22                                | 13.2                      |
| N      | 31                                    | 24.6                                    | 0.23                                | 36.8                      |
| S      | 18                                    | 52.8                                    | 0.22                                | 15.7                      |

<sup>a</sup> Calculated from the  $D_c = K\lambda/\beta \cos(\theta)$  (Scherrer equation) based on the Co<sub>3</sub>O<sub>4</sub> (311)
